# Supplementary material
Source: MDPI journal article supplement (https://www.mdpi.com/2073-4352/12/7/963)
Supplement: s1 [file s1]

# Rapid Aqueous-phase Synthesis and Photoluminescence Properties of $K_{0.3}Bi_{0.7}F_{2.4}:Ln^{3+}$ ( $Ln = Eu, Tb, Pr, Nd, Sm, Dy$ ) Nanocrystalline Particles

Weili Wang, Shihai Miao \*, Dongxun Chen \* and Yanjie Liang \*

Key Laboratory for Liquid-Solid Structure Evolution and Processing of Materials, Ministry of Education, Shandong University, Jinan 250061, China; wangweili@sdu.edu.cn

\* Correspondence: 202020485@mail.sdu.edu.cn (S.M.); 202120530@mail.sdu.edu.cn (D.C.); yanjie.liang@sdu.edu.cn (Y.L.)

## 1. Materials synthesis

Typically, solution A was prepared by dissolving  $BiCl_3$  and  $LnCl_3 \cdot 6H_2O$  in 6 mL of HCl solution ( $\geq 1.5$  M). Note that high concentration HCl solution was used here in order to prevent the hydrolysis of  $Bi^{3+}$ . Meanwhile, solution B was prepared by dissolving KF in 2.5 mL of deionized water in another Teflon beaker. Subsequently, the solution A was added into the solution B. The resultant mixture was stirred for 1 min at room temperature  $\sim 80$  °C. After the reaction, the obtained product was centrifuged, washed several times with deionized water and ethanol, and dried at 50 °C for 12 h to obtain the final products.

## 2. Characterization

The crystal structure and phase composition were measured by powder X-ray diffraction (XRD, DMAX-2500PC, Rigaku) with a scanning speed of  $10^\circ \text{ min}^{-1}$ . The morphology of the as-prepared nanophosphors was analyzed using a field-emission scanning electron microscope (SEM, JSM-7800F, JEOL). The photoluminescence properties were studied by using an Edinburgh FLS1000 fluorescence spectrophotometer equipped with the 450 W Xe lamp and a photomultiplier tube (measurement range, 200–900 nm). The decay curves were also performed on the same fluorescence spectrophotometer by using a 60 W  $\mu\text{s}$  flash lamp as an excitation source.

**Citation:** Wang, W.; Miao, S.; Chen, D.; Liang, Y. Rapid Aqueous-Phase Synthesis and Photoluminescence Properties of  $K_{0.3}Bi_{0.7}F_{2.4}:Ln^{3+}$  ( $Ln = Eu, Tb, Pr, Nd, Sm, Dy$ ) Nanocrystalline Particles. *Crystals* **2022**, *12*, 963. <https://doi.org/10.3390/cryst12070963>

Academic Editors: Alessandra Toncelli and Željka Antić

Received: 17 June 2022

Accepted: 8 July 2022

Published: 10 July 2022

**Publisher's Note:** MDPI stays neutral with regard to jurisdictional claims in published maps and institutional affiliations.

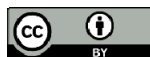

**Copyright:** © 2022 by the authors. Licensee MDPI, Basel, Switzerland. This article is an open access article distributed under the terms and conditions of the Creative Commons Attribution (CC BY) license (<https://creativecommons.org/licenses/by/4.0/>).

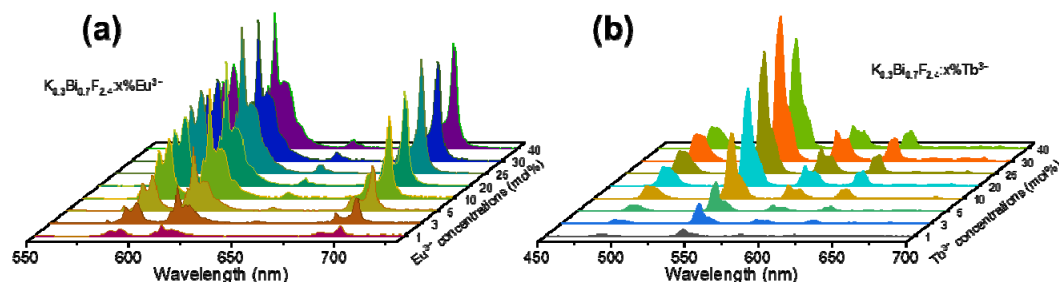

Figure S1. Emission spectra of the KBF:Ln (Ln = Eu, Tb) samples doped with different Ln<sup>3+</sup> concentration.

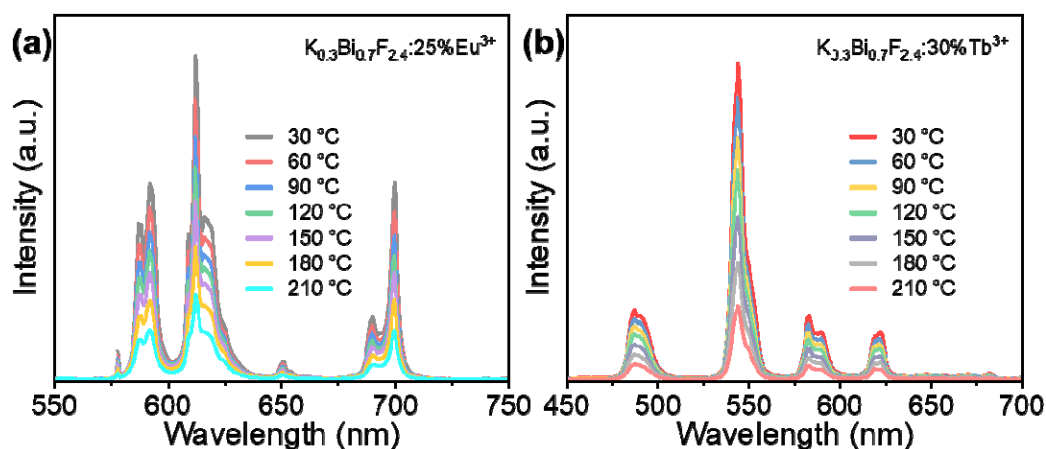

Figure S2. Temperature-dependent emission spectra of the KBF:25%Eu (a) and KBF:30%Tb (b) samples.

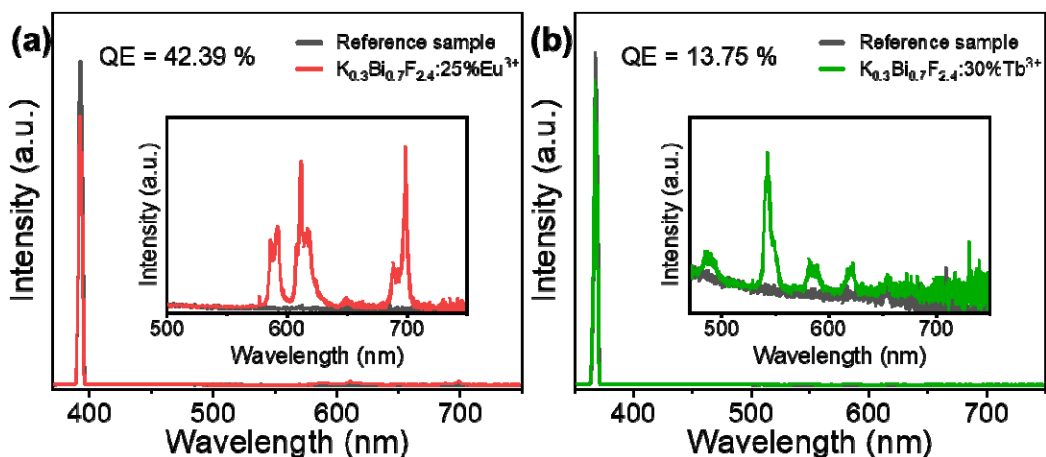

Figure S3. Excitation line of BaSO<sub>4</sub> and emission spectrum of KBF:25%Eu (a) and KBF:30%Tb (b) samples. Inset shows the magnification of the emission spectrum.

Table S1. The crystallite size of pure KBF synthesized at different reaction temperatures.

| Samples     | K     | $\lambda$ /nm | (h k l) | 2-Theta/° | FWHM/° | D/nm  |
|-------------|-------|---------------|---------|-----------|--------|-------|
| KBF (RT)    |       |               |         | 26.180    | 0.164  | 52.11 |
| KBF (50 °C) | 0.943 | 0.15406       | (1 1 1) | 26.201    | 0.155  | 55.14 |
| KBF (80 °C) |       |               |         | 26.161    | 0.141  | 60.61 |

**Table S2.** The crystallite size of the lanthanide doped KBF nanocrystalline particles.

| Samples                 | K     | $\lambda/\text{nm}$ | (h k l) | 2-Theta/ $^{\circ}$ | FWHM/ $^{\circ}$ | D/nm  |
|-------------------------|-------|---------------------|---------|---------------------|------------------|-------|
| KBF:5%Pr <sup>3+</sup>  | 0.943 | 0.15406             | (1 1 1) | 26.160              | 0.190            | 44.98 |
| KBF:2%Nd <sup>3+</sup>  |       |                     |         | 26.241              | 0.168            | 50.87 |
| KBF:5%Sm <sup>3+</sup>  |       |                     |         | 26.119              | 0.186            | 45.94 |
| KBF:5%Dy <sup>3+</sup>  |       |                     |         | 26.142              | 0.215            | 39.75 |
| KBF:25%Eu <sup>3+</sup> |       |                     |         | 26.339              | 0.302            | 28.31 |
| KBF:30%Tb <sup>3+</sup> |       |                     |         | 26.42               | 0.419            | 20.41 |
